# Supplementary material for: Mudrock Microstructure: A Technique for Distinguishing between Deep-Water Fine-Grained Sediments
Source: MDPI journal article supplement (doi:10.3390/min11060653), 2021-06-20
Supplement: s1 [file s1]

**Table S1.** Rose diagrams showing orientation patterns for contourite, hemipelagite and turbidites. The arrow indicates the direction of the bedding. Contourites are generally random but can show parallel to bedding. Hemipelagites are characterised by a mixture of oblique and random orientations while turbidite are dominantly parallel to bedding. Arrow indicates direction parallel to the bedding. OB= Oblique P= bedding parallel R= random orientation SR= Semi random

| S/N | Sediment type/Depth/<br>Sed. rate            | Subset A | Subset B | Subset C | Subset D | Subset E | Subset F |
|-----|----------------------------------------------|----------|----------|----------|----------|----------|----------|
| 1   | Contourite<br>9 m<br>25 cm/ky<br>Silt<br>↔   | P<br>    | SR<br>   | P<br>    | P<br>    |          |          |
| 1   | Contourite<br>9 m<br>25 cm/ky<br>Clay<br>↔   | P<br>    | SR<br>   | P<br>    | P<br>    |          |          |
| 2   | Contourite<br>10 m<br>25 cm/ky<br>Silt<br>↔  | P<br>    | P<br>    | P<br>    | P<br>    |          |          |
| 2   | Contourite<br>10 m<br>25 cm/ky<br>Clay<br>↔  | P<br>    | P<br>    | P<br>    | P<br>    |          |          |
| 3   | Contourite<br>14 m<br>100 cm/ky<br>Silt<br>↔ | OB<br>   | SR<br>   | SR<br>   | OB<br>   |          |          |
| 3   | Contourite<br>14 m<br>100 cm/ky<br>Clay<br>↔ | SR<br>   | SR<br>   | SR<br>   | SR<br>   |          |          |
| 4   | Contourite<br>15 m<br>100 cm/ky<br>Silt<br>↔ | OB<br>   | SR<br>   | SR<br>   | P<br>    |          |          |
| 4   | Contourite<br>15 m<br>100 cm/ky<br>Clay<br>↔ | SR<br>   | P<br>    | SR<br>   | P<br>    |          |          |
| 5   | Contourite<br>16 m<br>25 cm/ky<br>Silt<br>↔  | OB<br>   | P<br>    | OB<br>   | P<br>    |          |          |
| 5   | Contourite<br>16 m<br>25 cm/ky<br>Clay<br>↔  | SR<br>   | P<br>    | SR<br>   | P<br>    |          |          |

|    |                                              |    |    |    |    |    |    |
|----|----------------------------------------------|----|----|----|----|----|----|
| 6  | Contourite<br>42 m<br>40 cm/ky<br>Silt<br>↔  | R  | SR | SR | R  | SR | P  |
| 6  | Contourite<br>42 m<br>40 cm/ky<br>Clay<br>↔  | R  | SR | R  | R  | SR | SR |
| 7  | Contourite<br>151 m<br>40 cm/ky<br>Silt<br>↔ | SR | SR | SR | P  | R  |    |
| 7  | Contourite<br>151 m<br>40 cm/ky<br>Clay<br>↔ | R  | R  | R  | R  | R  |    |
| 8  | Contourite<br>253 m<br>40 cm/ky<br>Silt<br>↔ | SR | R  | OB | R  |    |    |
| 8  | Contourite<br>253 m<br>40 cm/ky<br>Clay<br>↔ | R  | R  | R  | R  |    |    |
| 9  | Contourite<br>343 m<br>40 cm/ky<br>Silt<br>↔ | P  | OB | SR | SR |    |    |
| 9  | Contourite<br>343 m<br>40 cm/ky<br>Clay<br>↔ | SR | SR | SR | R  |    |    |
| 10 | Contourite<br>510 m<br>35 cm/ky<br>Silt<br>↔ | R  | R  | R  | R  |    |    |
| 10 | Contourite<br>510 m<br>35 cm/ky<br>Clay<br>↔ | R  | R  | R  | R  |    |    |

|    |                                              |        |        |        |        |        |  |
|----|----------------------------------------------|--------|--------|--------|--------|--------|--|
| 11 | Contourite<br>563 m<br>40 cm/ky<br>Silt<br>↔ | P<br>  | SR<br> | R<br>  | SR<br> |        |  |
| 11 | Contourite<br>563 m<br>40 cm/ky<br>Clay<br>↔ | SR<br> | SR<br> | SR<br> | SR<br> |        |  |
| 12 | Contourite<br>653 m<br>40 cm/ky<br>Silt<br>↔ | R<br>  | R<br>  | R<br>  | R<br>  |        |  |
| 12 | Contourite<br>653 m<br>40 cm/ky<br>Clay<br>↔ | R<br>  | R<br>  | R<br>  | R<br>  |        |  |
| 13 | Contourite<br>734 m<br>25 cm/ky<br>Silt<br>↔ | R<br>  | R<br>  | R<br>  | R<br>  | R<br>  |  |
| 13 | Contourite<br>734 m<br>25 cm/ky<br>Clay<br>↔ | R<br>  | R<br>  | R<br>  | R<br>  | R<br>  |  |
| 14 | Contourite<br>763 m<br>40 cm/ky<br>Silt<br>↔ | P<br>  | R<br>  | P<br>  | P<br>  | P<br>  |  |
| 14 | Contourite<br>763 m<br>40 cm/ky<br>Clay<br>↔ | SR<br> | SR<br> | SR<br> | R<br>  | SR<br> |  |
| 15 | Contourite<br>808 m<br>25 cm/ky<br>Silt<br>↔ | SR<br> | P<br>  | P<br>  | P<br>  | P<br>  |  |
| 15 | Contourite<br>808 m<br>25 cm/ky<br>Clay<br>↔ | SR<br> | P<br>  | SR<br> | SR<br> | SR<br> |  |

|    |                                                |    |                                                                                     |                                                                                   |                                                                                     |                                                                                    |                                                                                     |    |                                                                                      |    |                                                                                       |    |                                                                                       |
|----|------------------------------------------------|----|-------------------------------------------------------------------------------------|-----------------------------------------------------------------------------------|-------------------------------------------------------------------------------------|------------------------------------------------------------------------------------|-------------------------------------------------------------------------------------|----|--------------------------------------------------------------------------------------|----|---------------------------------------------------------------------------------------|----|---------------------------------------------------------------------------------------|
| 16 | Contourite<br>860 m<br>40 cm/ky<br>Silt<br>↔   | P  | 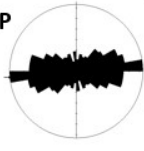   |  |    |  |  |    |                                                                                      |    |                                                                                       |    |                                                                                       |
| 16 | Contourite<br>860 m<br>40 cm/ky<br>Clay<br>↔   | P  |    | P                                                                                 |    | SR                                                                                 |    | R  |    | R  |    |    |                                                                                       |
| 17 | Contourite<br>943 m<br>40 cm/ky<br>Silt<br>↔   | SR |    | R                                                                                 |    | R                                                                                  |    | R  |    |    |                                                                                       |    |                                                                                       |
| 17 | Contourite<br>943 m<br>40 cm/ky<br>Clay<br>↔   | R  |    | R                                                                                 |    | R                                                                                  |    | R  |    |    |                                                                                       |    |                                                                                       |
| 18 | Hemipelagites<br>8 m<br>10 cm/ky<br>Silt<br>↔  | OB |    | OB                                                                                |    | R                                                                                  |    | OB |    | OB |    |    |                                                                                       |
| 18 | Hemipelagites<br>8 m<br>10 cm/ky<br>Clay<br>↔  | R  |   | R                                                                                 |   | R                                                                                  |   | OB |   | R  |   |    |                                                                                       |
| 19 | Hemipelagites<br>10 m<br>10 cm/ky<br>Silt<br>↔ | R  |  | SR                                                                                |  | SR                                                                                 |  | R  |  | SR |  | OB |  |
| 19 | Hemipelagites<br>10 m<br>10 cm/ky<br>Clay<br>↔ | R  |  | R                                                                                 |  | R                                                                                  |  | R  |  | SR |  | R  |  |
| 20 | Hemipelagites<br>15 m<br>10 cm/ky<br>Silt<br>↔ | OB |  | OB                                                                                |  | SR                                                                                 |  | OB |  | R  |  | R  |  |
| 20 | Hemipelagites<br>15 m<br>10 cm/ky<br>Clay<br>↔ | R  |  | SR                                                                                |  | R                                                                                  |  | OB |  | R  |  | R  |  |
| 21 | Hemipelagites<br>50 m<br>10 cm/ky<br>Silt<br>↔ | OB |  | OB                                                                                |  | R                                                                                  |  | R  |  | R  |  | OB |  |
| 21 | Hemipelagites<br>50 m<br>10 cm/ky<br>Clay<br>↔ | R  |  | R                                                                                 |  | R                                                                                  |  | R  |  | R  |  | OB |  |

|    |                                                 |    |    |    |    |    |    |
|----|-------------------------------------------------|----|----|----|----|----|----|
| 22 | Hemipelagites<br>57 m<br>10 cm/ky<br>Silt<br>↔  | R  | R  | OB | OB | OB |    |
| 22 | Hemipelagites<br>57 m<br>10 cm/ky<br>Clay<br>↔  | R  | R  | R  | R  | OB |    |
| 23 | Hemipelagites<br>60 m<br>10 cm/ky<br>Silt<br>↔  | R  | R  | R  | R  | R  | OB |
| 23 | Hemipelagites<br>60 m<br>10 cm/ky<br>Clay<br>↔  | R  | R  | R  | R  | R  | OB |
| 24 | Hemipelagites<br>80 m<br>10 cm/ky<br>Silt<br>↔  | OB | OB | OB | OB | OB | OB |
| 24 | Hemipelagites<br>80 m<br>10 cm/ky<br>Clay<br>↔  | OB | R  | OB | OB | OB | OB |
| 25 | Hemipelagites<br>117 m<br>10 cm/ky<br>Silt<br>↔ | R  | OB | OB | OB |    |    |
| 25 | Hemipelagites<br>117 m<br>10 cm/ky<br>Clay<br>↔ | R  | OB | OB | SR |    |    |
| 26 | Hemipelagite<br>68 m<br>10 cm/ky<br>Silt<br>↔   | OB | OB | OB | OB | OB | OB |
| 26 | Hemipelagite<br>68 m<br>10 cm/ky<br>Clay<br>↔   | OB | SR | OB | OB | SR | OB |
| 27 | Turbidite<br>66 m<br>Silt<br>↔                  | OB | P  | OB | OB |    |    |
| 27 | Turbidite<br>66 m<br>Clay<br>↔                  | OB | P  | OB | OB |    |    |

|    |                                 |        |        |        |       |  |  |
|----|---------------------------------|--------|--------|--------|-------|--|--|
| 28 | Turbidite<br>132 m<br>Silt<br>↔ | P<br>  | OB<br> | OB<br> | P<br> |  |  |
| 28 | Turbidite<br>132 m<br>Clay<br>↔ | P<br>  | OB<br> | OB<br> | P<br> |  |  |
| 29 | Turbidite<br>260 m<br>Silt<br>↔ | P<br>  | P<br>  | P<br>  | P<br> |  |  |
| 29 | Turbidite<br>260 m<br>Clay<br>↔ | SR<br> | P<br>  | P<br>  | P<br> |  |  |
| 30 | Turbidite<br>348 m<br>Silt<br>↔ | P<br>  | P<br>  | P<br>  | P<br> |  |  |
| 30 | Turbidite<br>348 m<br>Clay<br>↔ | P<br>  | P<br>  | P<br>  | P<br> |  |  |
| 31 | Turbidite<br>455 m<br>Silt<br>↔ | P<br>  | P<br>  | P<br>  | P<br> |  |  |
| 31 | Turbidite<br>455 m<br>Clay<br>↔ | P<br>  | P<br>  | P<br>  | P<br> |  |  |
| 32 | Turbidite<br>541 m<br>Silt<br>↔ | OB<br> | OB<br> | P<br>  | P<br> |  |  |
| 32 | Turbidite<br>541 m<br>Clay<br>↔ | OB<br> | OB<br> | P<br>  | P<br> |  |  |
| 33 | Turbidite<br>543 m<br>Silt<br>↔ | P<br>  | P<br>  | P<br>  | P<br> |  |  |
| 33 | Turbidite<br>543 m<br>Clay<br>↔ | SR<br> | P<br>  | P<br>  | P<br> |  |  |

|    |                                 |       |        |        |       |  |  |
|----|---------------------------------|-------|--------|--------|-------|--|--|
| 34 | Turbidite<br>655 m<br>Clay<br>↔ | P<br> | P<br>  | P<br>  | P<br> |  |  |
| 35 | Turbidite<br>766 m<br>Silt<br>↔ | P<br> | P<br>  | P<br>  | P<br> |  |  |
| 35 | Turbidite<br>766 m<br>Clay<br>↔ | P<br> | SR<br> | SR<br> | P<br> |  |  |
| 36 | Turbidite<br>825 m<br>Silt<br>↔ | P<br> | P<br>  | P<br>  | P<br> |  |  |
| 36 | Turbidite<br>825 m<br>Clay<br>↔ | P<br> | P<br>  | P<br>  | P<br> |  |  |
| 37 | Turbidite<br>866 m<br>Silt<br>↔ | P<br> | P<br>  | P<br>  | P<br> |  |  |
| 37 | Turbidite<br>866 m<br>Clay<br>↔ | P<br> | P<br>  | P<br>  | P<br> |  |  |
| 38 | Turbidite<br>985 m<br>Silt<br>↔ | P<br> | P<br>  | P<br>  | P<br> |  |  |
| 38 | Turbidite<br>985 m<br>Clay<br>↔ | P<br> | P<br>  | P<br>  | P<br> |  |  |
